# Supplementary material for: Ideology, society and economy of the mesolithic communities in temperate and northern Europe
Source: Oxford University Press journal article supplement (doi:10.2337/dc13-2761), 1996-01-01
Supplement: dc132761supplementarydata.pdf [file dc132761supplementarydata.pdf]

## SUPPLEMENTARY DATA

### Criteria for Discontinuation Due to Hyperglycemia

**Supplementary Table 1.** Thresholds for FPG and HbA<sub>1c</sub> by Visit.

| Variable                            | Visits 5-7<br>(2-8 wks) | Visit 8<br>(9-12 wks) | Visit 9<br>(13-26 wks) | Visit 10<br>(27-39 wks) | Visits 11-15<br>(40-104<br>wks) |
|-------------------------------------|-------------------------|-----------------------|------------------------|-------------------------|---------------------------------|
| FPG<br>(mg/dL)                      | >270                    | >240                  | >220                   | >220                    | --                              |
|                                     |                         |                       |                        | or                      |                                 |
| HbA <sub>1c</sub><br>(% [mmol/mol]) | --                      | --                    | --                     | >8.5% (69)              | >8.0% (64)                      |

Abbreviations: -- = not applicable; HbA<sub>1c</sub> = glycosylated hemoglobin A<sub>1c</sub>; FPG = fasting plasma glucose; wks = weeks.

Patients were to be discontinued from the study if they developed persistent or worsening hyperglycemia beyond the thresholds for FPG or HbA<sub>1c</sub> as specified in Table S1 above, and the criteria outlined below.

- If fasting self-monitored plasma glucose (SMPG) values meeting the above thresholds were consistently recorded by the patient for at least 2 weeks and not secondary to a readily identifiable illness or pharmacological treatment, in the opinion of the investigator, the patient was to be discontinued from the trial.
- If a patient had a FPG value (central laboratory) that met the criteria above, but the patient's fasting SMPG and/or HbA<sub>1c</sub> values were inconsistent with this random FPG, the patient would receive intensified dietary counseling and have a repeat FPG measurement in 1 month. If the FPG value still met the above criteria, the patient was to be discontinued from the trial.

## SUPPLEMENTARY DATA

**Supplementary Table 2.** Other endpoints of interest, change from baseline at 26 and 52 weeks.

|                                                                 | 26 weeks                  |                           |                            |               | 52 weeks                    |                             |                 |
|-----------------------------------------------------------------|---------------------------|---------------------------|----------------------------|---------------|-----------------------------|-----------------------------|-----------------|
|                                                                 | DU1.5 mg<br>(N=304)       | DU 0.75<br>mg<br>(N=302)  | SITA<br>(N=315)            | PL<br>(N=177) | DU 1.5<br>mg<br>(N=304)     | DU 0.75<br>mg<br>(N=302)    | SITA<br>(N=315) |
| Insulin and HOMA Parameters                                     |                           |                           |                            |               |                             |                             |                 |
| Fasting insulin<br>(pmol/L) <sup>a</sup>                        | 11.6 (6.6)                | 10.2 (6.5)                | 8.5 (6.7)                  | -6.9<br>(9.2) | 10.6 (6.0)                  | 13.0 (5.9)                  | 4.2 (6.0)       |
| HOMA2-%B                                                        | 32.3 (2.7) <sup>###</sup> | 27.0 (2.6) <sup>###</sup> | 10.8<br>(2.7)              | 1.6 (4.0)     | 33.6<br>(2.5) <sup>##</sup> | 22.3<br>(2.5) <sup>##</sup> | 6.7 (2.5)       |
| HOMA2-%S <sup>a</sup>                                           | 5.8 (2.3)                 | 0.8 (2.3) <sup>*</sup>    | 2.3 (2.3)                  | 9.8 (3.5)     | 4.7 (2.4)                   | 2.3 (2.3)                   | 4.3 (2.4)       |
| Lipid Parameters, median (mmol/L)                               |                           |                           |                            |               |                             |                             |                 |
| Total<br>cholesterol                                            | -0.21 <sup>###</sup>      | -0.02                     | 0.11                       | 0.07          | -0.03                       | -0.03                       | 0.10            |
| LDL<br>cholesterol                                              | -0.18 <sup>##</sup>       | -0.05 <sup>#</sup>        | 0.10                       | 0.02          | -0.06 <sup>#</sup>          | 0.02                        | 0.12            |
| HDL<br>cholesterol                                              | 0.02                      | 0.03                      | 0.03                       | 0.05          | 0.05                        | 0.07                        | 0.05            |
| Triglycerides                                                   | -0.19                     | -0.14                     | -0.09                      | -0.07         | -0.16                       | -0.15                       | -0.06           |
| Pancreatic Enzymes, median [Q1,Q3] (U/L) <sup>b</sup>           |                           |                           |                            |               |                             |                             |                 |
| Lipase                                                          | 6 [-2,17] <sup>###</sup>  | 5 [-1, 16] <sup>**</sup>  | 4<br>[-2,11] <sup>**</sup> | -1 [-7,7]     | 6 [-2,15]                   | 5 [-1,15]                   | 4 [-2,11]       |
| Total Amylase                                                   | 7 [-1,14] <sup>###</sup>  | 6 [0,15] <sup>##</sup>    | 4 [-2,11]                  | 2 [-6,<br>10] | 6 [0,15] <sup>#</sup>       | 6 [0,15] <sup>#</sup>       | 4 [-3,12]       |
| p-Amylase                                                       | 4 [1,10] <sup>###</sup>   | 3 [0,9] <sup>##</sup>     | 2 [-1,6] <sup>**</sup>     | 0 [-3,4]      | 4 [1,10] <sup>#</sup>       | 3 [0,9]                     | 3 [0,7]         |
| Patients with TE Abnormal (n, %) <sup>c</sup>                   |                           |                           |                            |               |                             |                             |                 |
| Lipase                                                          | 109 (43) <sup>**</sup>    | 92 (37) <sup>*</sup>      | 97 (36) <sup>*</sup>       | 37 (25)       | 124 (49)                    | 111 (45)                    | 110 (41)        |
| Total<br>Amylase                                                | 33 (12)                   | 33 (13)                   | 27 (10)                    | 13 (9)        | 38 (14)                     | 42 (16)                     | 36 (13)         |
| p-Amylase                                                       | 54 (19) <sup>*</sup>      | 55 (20) <sup>*</sup>      | 42 (14)                    | 18 (11)       | 67 (24)                     | 70 (25)                     | 55 (19)         |
| Pancreatic Enzymes, n (%) of patients with ≥3x ULN <sup>d</sup> |                           |                           |                            |               |                             |                             |                 |
| Lipase                                                          | 19 (6.3)                  | 21 (7.0)                  | 20 (6.3)                   | 11 (6.3)      | 22 (7.3)                    | 26 (8.7)                    | 27 (8.6)        |
| p-Amylase                                                       | 2 (0.7)                   | 1 (0.3)                   | 1 (0.3)                    | 1 (0.6)       | 2 (0.7)                     | 4 (1.3)                     | 1 (0.3)         |

<sup>a</sup>Measurements collected after completion of dose-finding portion of the trial.

<sup>b</sup>The normal range of serum values for lipase, total amylase, and p-amylase are 0-60 U/L, 20-112 U/L, and 13-53 U/L, respectively.

<sup>c</sup>Cumulative number (%) of patients with at least one treatment emergent abnormality.

<sup>d</sup>Percentages are based on the number of patients with baseline and at least 1 postbaseline result in specified treatment arm during the time period assessed.

All data are LS mean (SE) unless otherwise noted. #, \**P* < 0.05 vs. sitagliptin and placebo, respectively. ##, \*\**P* < 0.001 vs. sitagliptin and placebo, respectively. Abbreviations: DU = dulaglutide; HOMA2-B= updated homeostasis model beta cell function; HOMA2-S= updated homeostasis model insulin sensitivity; p-amylase= pancreatic amylase; PL = placebo; Q<sub>x</sub>= quartile number; SITA = sitagliptin; TE= treatment-emergent; ULN= upper limit of normal for central laboratory reference range.
